# Supplementary material for: Engineering the structures of ZnCo-MOFs via a ligand effect for enhanced supercapacitor performance
Source: Royal Society of Chemistry journal article supplement (doi:10.1039/d4ra08192g), 2025-01-01
Supplement: d4ra08192g1.pdf [file d4ra08192g1.pdf]

## Supplementary Information

### Engineering the structures of ZnCo-MOFs via ligand effect for enhanced supercapacitor performance

Kabir Opeyemi Otun\*, Ndeye Fatou Diop, Oladepo Fasakin, Rashed Ali Mohamed Adam, Gift Rutavi, Ncholu Manyala\*

Department of Physics, Institute of Applied Materials, University of Pretoria, 0001, Pretoria, South Africa

Corresponding authors' email: [otunkabir2705@gmail.com](mailto:otunkabir2705@gmail.com), [ncholu.manyala@up.ac.za](mailto:ncholu.manyala@up.ac.za)

Table S1: Properties of organic ligands used for this study

| Organic ligand | Molecular formula                             | Structural formula                                                                  | Molecular mass | CAS No.    |
|----------------|-----------------------------------------------|-------------------------------------------------------------------------------------|----------------|------------|
| HMIM           | C <sub>4</sub> H <sub>6</sub> N <sub>2</sub>  | 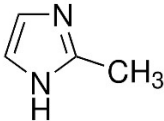   | 82.10          | 693-98-1   |
| BDC            | C <sub>8</sub> H <sub>6</sub> O <sub>4</sub>  |  | 166.13         | 110-21-0   |
| ABDC           | C <sub>8</sub> H <sub>7</sub> NO <sub>4</sub> |  | 181.15         | 10312-55-7 |

Table S2: N<sub>2</sub> adsorption-desorption measurement results of ZnCo-MOFs

| <b>Sample</b>        | <b>BET surface area (m<sup>2</sup>/g)</b> | <b>Micropore surface area (m<sup>2</sup>/g)</b> | <b>Mesopore surface area (m<sup>2</sup>/g)</b> | <b>Total pore volume (cm<sup>3</sup>/g)</b> | <b>Micropore volume (cm<sup>3</sup>/g)</b> | <b>Average pore size (nm)</b> |
|----------------------|-------------------------------------------|-------------------------------------------------|------------------------------------------------|---------------------------------------------|--------------------------------------------|-------------------------------|
| <b>ZnCo-MOF-HMIM</b> | 66.76                                     | 0.000                                           | 66.76                                          | 0.1366                                      | 0.000000                                   | 8.18                          |
| <b>ZnCo-MOF-BDC</b>  | 12.97                                     | 1.058                                           | 11.91                                          | 0.0160                                      | 0.000235                                   | 4.95                          |
| <b>ZnCo-MOF-ABDC</b> | 15.06                                     | 5.479                                           | 9.58                                           | 0.0802                                      | 0.067621                                   | 21.29                         |

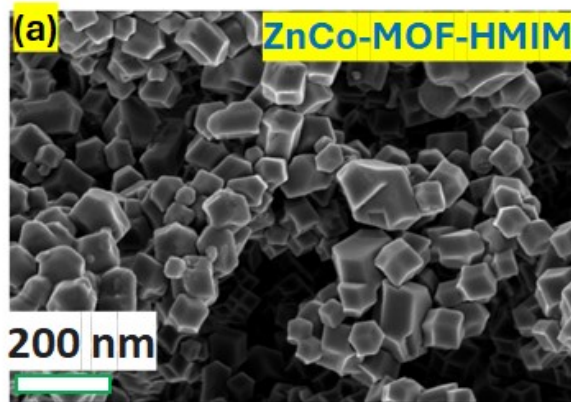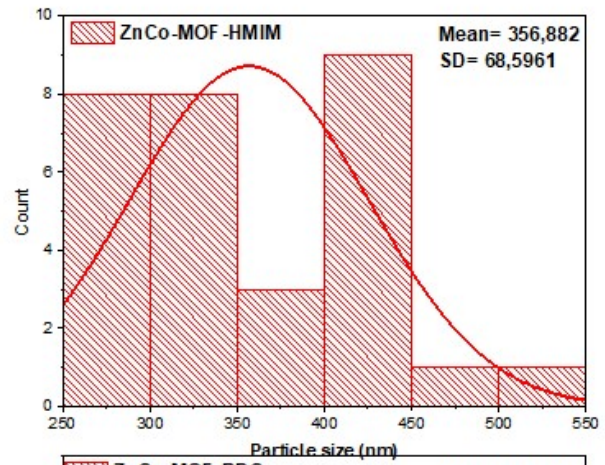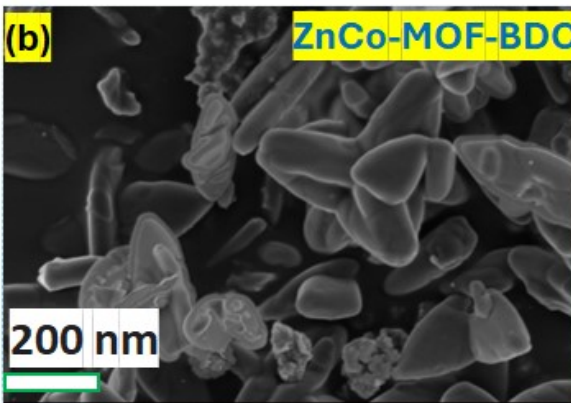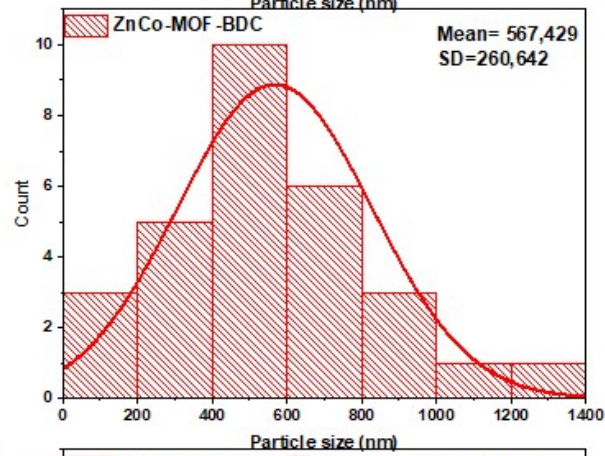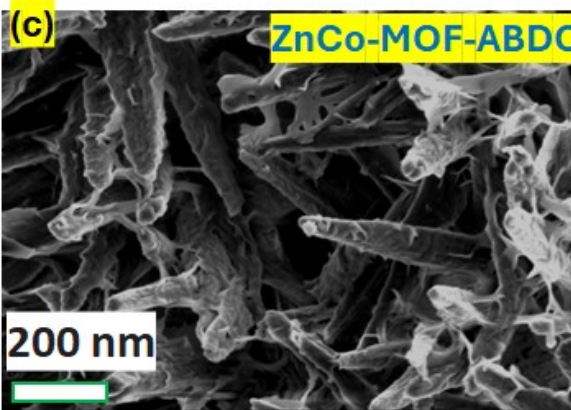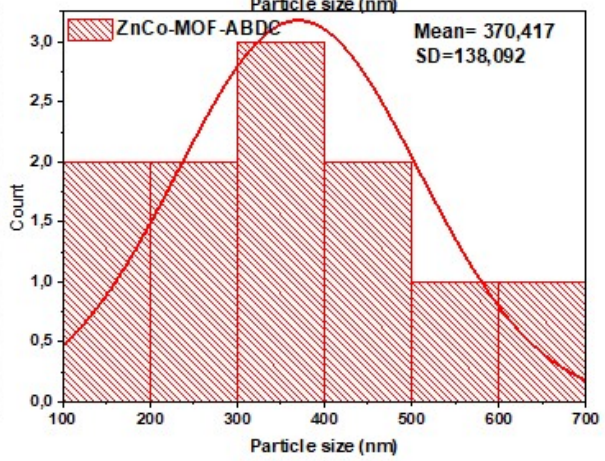

Fig. S1: SEM images and particle size (nm) distribution of ZnCo-MOFs

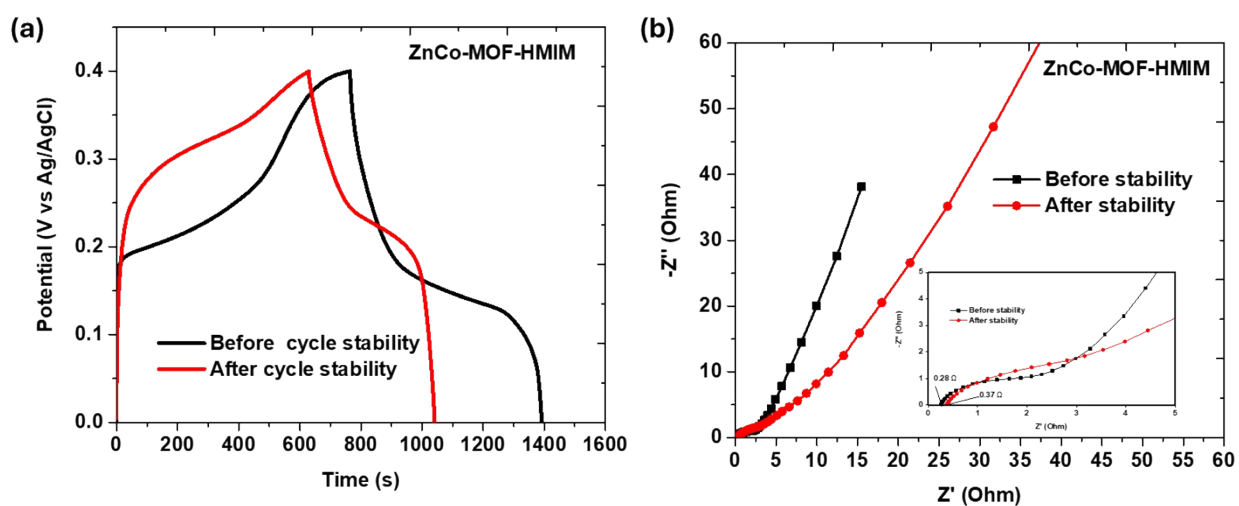

Fig. S2: GCD and EIS of ZnCo-MOF-HMIM after 5000 charge-discharge cycles

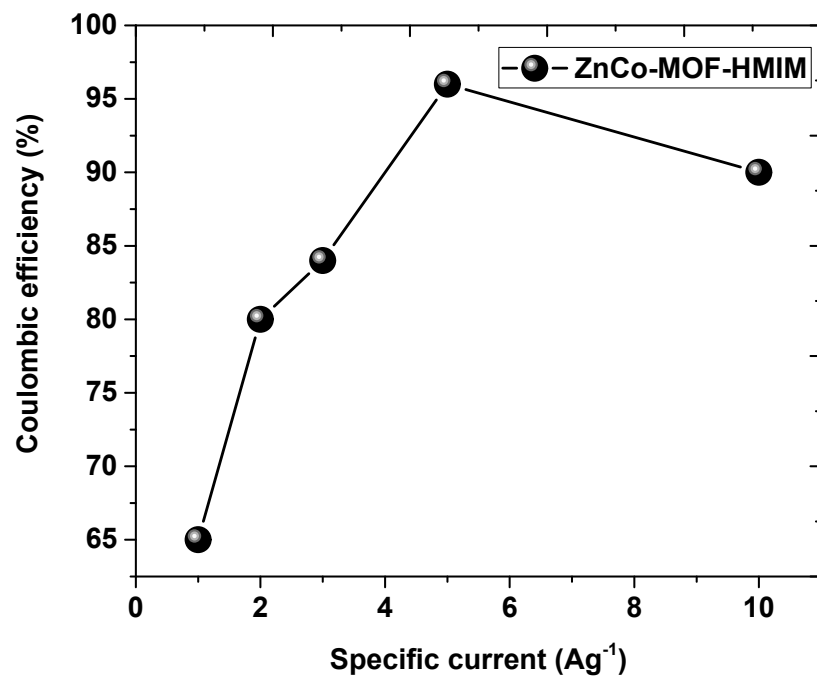

Fig. S3: Coulombic efficiency of ZnCo-MOF-HMIM at different specific currents.

(2020).
